# Supplementary material for: Research on Cooperative Scheduling of Automated Quayside Cranes and Automatic Guided Vehicles in Automated Container Terminal
Source: Hindawi journal article supplement (doi:10.1155/2019/6574582), 2019-01-01
Supplement: f1 [file 6574582.f1.pdf]

In order to facilitate comparison, the author also solves the case of 10 times by using hill-climbing algorithm, genetic algorithm, and simulated annealing algorithm. Here are the results of various algorithms.

**Table 1 Calculation results of the hill-climbing algorithm**

| N  | TD(km) | N <sub>i</sub> | C <sub>i</sub> (s) | TT(min) | TEC(kWh) |
|----|--------|----------------|--------------------|---------|----------|
| 1  | 233.29 | 349            | 1.5                | 157.58  | 714.61   |
| 2  | 236.99 | 276            | 1.6                | 173.78  | 718.15   |
| 3  | 235.45 | 312            | 1.65               | 231.88  | 724.92   |
| 4  | 239.38 | 330            | 1.67               | 176.32  | 723.31   |
| 5  | 235.44 | 340            | 1.69               | 233.15  | 718.65   |
| 6  | 226.22 | 303            | 1.67               | 211.57  | 724.82   |
| 7  | 232.84 | 371            | 1.68               | 168.95  | 723.01   |
| 8  | 228.14 | 300            | 1.7                | 179.46  | 706.63   |
| 9  | 240.83 | 315            | 1.7                | 209.72  | 731.2    |
| 10 | 227.62 | 354            | 1.74               | 157.39  | 731.6    |

**Table 2 Calculation results of the genetic algorithm**

| N  | TD(km) | N <sub>i</sub> | C <sub>i</sub> (s) | TT(min) | TEC(kWh) |
|----|--------|----------------|--------------------|---------|----------|
| 1  | 212.48 | 267            | 2.07               | 152.71  | 735.7    |
| 2  | 217.54 | 294            | 2.88               | 176.52  | 772.01   |
| 3  | 210.88 | 276            | 2.6                | 155.42  | 763.9    |
| 4  | 254.72 | 260            | 2.5                | 177.02  | 625.79   |
| 5  | 227.67 | 264            | 2.1                | 176.42  | 797.4    |
| 6  | 215.83 | 255            | 2.77               | 187.52  | 771.1    |
| 7  | 212.86 | 243            | 2.6                | 133.62  | 721.2    |
| 8  | 254.68 | 277            | 2.5                | 178.61  | 625.2    |
| 9  | 225.97 | 330            | 2.14               | 155.32  | 648.9    |
| 10 | 193.47 | 224            | 2.24               | 132.72  | 695.7    |

**Table 3 Calculation results of the simulated annealing algorithm**

| N  | TD(km) | N <sub>i</sub> | C <sub>i</sub> (s) | TT(min) | TEC(kWh) |
|----|--------|----------------|--------------------|---------|----------|
| 1  | 185.15 | 287            | 1.73               | 126.61  | 706.87   |
| 2  | 194.63 | 303            | 1.75               | 126.14  | 708.57   |
| 3  | 222.4  | 330            | 1.7                | 132.07  | 708.96   |
| 4  | 208.51 | 337            | 1.8                | 130.06  | 703.24   |
| 5  | 204.57 | 321            | 1.8                | 127.36  | 709.72   |
| 6  | 201.33 | 233            | 1.78               | 126.57  | 710.45   |
| 7  | 188.9  | 332            | 1.74               | 126.45  | 715.82   |
| 8  | 211.8  | 272            | 1.77               | 132.25  | 703      |
| 9  | 202.47 | 327            | 1.7                | 127.9   | 704.52   |
| 10 | 216.84 | 318            | 1.83               | 125.19  | 690.95   |

**Table 4 Calculation results of the two-stage taboo search algorithm**

| N  | TD(km)  | N <sub>i</sub> | C <sub>i</sub> (s) | TT(min) | TEC(kWh) |
|----|---------|----------------|--------------------|---------|----------|
| 1  | 202.36  | 268            | 1.7                | 125.17  | 707.53   |
| 2  | 204.11  | 320            | 1.7                | 125.67  | 710.27   |
| 3  | 204.22  | 358            | 1.7                | 124.55  | 709.36   |
| 4  | 198.56  | 345            | 1.7                | 120.77  | 697.52   |
| 5  | 200.62  | 303            | 1.7                | 124.67  | 704.79   |
| 6  | 203.99  | 146            | 1.65               | 125.78  | 711.175  |
| 7  | 209.88  | 232            | 1.7                | 126.33  | 721.2    |
| 8  | 196.505 | 312            | 1.7                | 116.87  | 690.252  |
| 9  | 197.25  | 383            | 1.76               | 123.55  | 698.4    |
| 10 | 198.1   | 313            | 1.7                | 125.23  | 701.15   |

**Table 5 Comparison of calculation results of the hill-climbing algorithm, simulated annealing algorithm, genetic algorithm, and taboo search algorithm**

| Algorithm type      | Hill-climbing Algorithm | Genetic Algorithm | Simulated Annealing Algorithm | Two-stage Taboo Search Algorithm |
|---------------------|-------------------------|-------------------|-------------------------------|----------------------------------|
| ATD(km)             | 234.62                  | 222.61            | 203.66                        | 201.56                           |
| AN <sub>i</sub>     | 13000                   | 10760             | 12240                         | 11920                            |
| AC <sub>t</sub> (s) | 1.66                    | 2.44              | 1.76                          | 1.7                              |
| ATT(min)            | 189.98                  | 165.96            | 128.06                        | 123.86                           |
| A TEC(kwh)          | 721.69                  | 715.69            | 706.21                        | 705.16                           |
| SD(kwh)             | 10.42                   | 8.07              | 6.38                          | 4.97                             |
